# Supplementary material
Source: PubMed Central journal article supplement (PMC5944374)
Supplement: LSHSS-48-234-s001.pdf [file LSHSS-48-234-s001.pdf]

**Supplemental Material.** Individual responses to the survey from those who stated that their child had stuttered at one point in time.

| Age at survey | Sex | Stuttering at time of survey | Age stuttering began | Age stuttering stopped | Description of stuttering             | Secondary behaviors | Avoidance behaviors | Description of secondary or avoidance behaviors                         | Received treatment for stuttering | Description of treatment                                                                           |
|---------------|-----|------------------------------|----------------------|------------------------|---------------------------------------|---------------------|---------------------|-------------------------------------------------------------------------|-----------------------------------|----------------------------------------------------------------------------------------------------|
| 4.5           | F   | No                           | 3                    | 4.5                    | Repetition, stutters, and blocks      | No                  | No                  |                                                                         | No                                |                                                                                                    |
| 4.6           | M   | No                           | 2.5                  | 3.5                    | Repetitions, prolongations            | No                  | No                  |                                                                         | No                                |                                                                                                    |
| 5.1           | M   | No                           | 3                    | 4                      | Prolongations                         | Yes                 | Yes                 | Eye blinking, sniffing, repetitive, avoiding socializing with kids      | Yes                               | Speech therapy                                                                                     |
| 5.2           | F   | No                           | 3                    | 4                      | Repetitions and prolongations         | No                  | No                  |                                                                         | No                                |                                                                                                    |
| 5.7           | F   | No                           | 3                    |                        | Repetitions                           | No                  | No                  |                                                                         | No                                |                                                                                                    |
| 6.1           | M   | No                           | 3                    |                        | Repetitions                           | No                  | No                  |                                                                         | No                                |                                                                                                    |
| 6.6           | M   | No                           | 1                    | 6                      | Repetitions                           | No                  | No                  |                                                                         | Yes                               | Speech therapy birth to present                                                                    |
| 6.8           | M   | No                           | 4                    | 4                      | Repetitions                           | No                  | No                  |                                                                         | No                                |                                                                                                    |
| 7.1           | M   | No                           | 5                    | 6                      | Repetitions                           | No                  | Yes                 | He would give up on what he was trying to say and tell us "never mind." | Yes                               | We brought it up with his teachers and we all worked on slowing him down to complete his sentences |
| 7.5           | M   | No                           | 3                    | 3                      | Repetitions                           | No                  | No                  |                                                                         | Yes                               | He was already receiving speech therapy, stuttering only last couple of weeks and stopped          |
| 7.8           | F   | No                           | 3                    |                        | Repetitions                           | No                  | No                  |                                                                         | No                                |                                                                                                    |
| 7.8           | M   | No                           | 5                    | 6                      | Repetitions of beginning of sentences | No                  | No                  |                                                                         | No                                |                                                                                                    |
| 8.2           | M   | No                           | 3                    | 4                      | Prolongations of beginning sounds     | No                  | No                  |                                                                         | No                                |                                                                                                    |

| Age at survey | Sex | Stuttering at time of survey | Age stuttering began | Age stuttering stopped | Description of stuttering                             | Secondary behaviors | Avoidance behaviors | Description of secondary or avoidance behaviors                                             | Received treatment for stuttering | Description of treatment                                                     |
|---------------|-----|------------------------------|----------------------|------------------------|-------------------------------------------------------|---------------------|---------------------|---------------------------------------------------------------------------------------------|-----------------------------------|------------------------------------------------------------------------------|
| 8.2           | M   | No                           | 3                    | 5                      | Prolongations                                         | No                  | Yes                 | He would whisper to me when speaking to others or he would not want to go to certain things | Yes                               | Speech                                                                       |
| 8.4           | M   | No                           | 3                    | 4                      | Blocks                                                | No                  | No                  |                                                                                             | No                                |                                                                              |
| 8.6           | M   | No                           | 3                    | 5                      | Repetitions and blocks                                | No                  | No                  |                                                                                             | No                                |                                                                              |
| 8.6           | M   | No                           | 6                    |                        | Prolongations                                         | No                  | No                  |                                                                                             | Yes                               | Speech and language services                                                 |
| 8.9           | F   | No                           | 4                    |                        | Prolongations                                         | Yes                 | Yes                 | She would discontinue speaking or choose not to speak at all                                | No                                |                                                                              |
| 9.3           | M   | No                           | 3                    | 3.5                    | Blocks                                                | No                  | No                  |                                                                                             | No                                |                                                                              |
| 9.8           | M   | No                           | 1.75                 | 3.5                    | Repetitions                                           | No                  | No                  |                                                                                             | Yes                               | Speech therapy 8–9 years, we have had ST since birth                         |
| 9.9           | M   | No                           | 3                    |                        | Prolongations                                         | No                  | Yes                 | Avoid certain words                                                                         | No                                |                                                                              |
| 11.1          | F   | No                           | 3                    | 7                      | Prolongations, seems like not enough air, repetitions | Yes                 | No                  | A lot of tics and tension behaviors                                                         | Yes                               |                                                                              |
| 11.3          | M   | No                           |                      |                        | Repetitions                                           | Prefer no answer    | Prefer no answer    |                                                                                             | No                                |                                                                              |
| 5.4           | M   | Yes                          | 5                    |                        | Repetitions and prolongations                         | No                  | No                  |                                                                                             | Yes                               | The hearing impaired teacher in the More at Four program is working with him |
| 5.7           | M   | Yes                          | 4                    |                        | Repetitions, prolongations and blocks                 | No                  | No                  |                                                                                             | Yes                               | Speech therapy at school                                                     |

| Age at survey | Sex | Stuttering at time of survey | Age stuttering began | Age stuttering stopped | Description of stuttering                                            | Secondary behaviors | Avoidance behaviors | Description of secondary or avoidance behaviors                                                              | Received treatment for stuttering | Description of treatment                                                      |
|---------------|-----|------------------------------|----------------------|------------------------|----------------------------------------------------------------------|---------------------|---------------------|--------------------------------------------------------------------------------------------------------------|-----------------------------------|-------------------------------------------------------------------------------|
| 5.8           | M   | Yes                          | 3                    |                        | Silent blocks early on, sound and syllable repetitions more recently | No                  | No                  |                                                                                                              | No                                |                                                                               |
| 6.2           | F   | Yes                          | 3                    |                        | Repetitions                                                          | No                  | No                  |                                                                                                              | No                                |                                                                               |
| 7.5           | F   | Yes                          | 4                    |                        | Repetitions, blocks                                                  | Yes                 | Yes                 | Under pressure more stuttering, avoidance of                                                                 | No                                |                                                                               |
| 7.9           | M   | Yes                          | 3                    |                        | Repetitions                                                          | No                  | No                  |                                                                                                              | No                                |                                                                               |
| 8.0           | F   | Yes                          | 5                    |                        | Repetitions of the beginnings of a word, prolongations, and blocks   | No                  | Yes                 | She tried to avoid saying certain words                                                                      | Yes                               | They are aware of it at speech, but are choosing not to treat it at this time |
| 8.0           | F   | Yes                          | 7.5                  |                        | Repetitions                                                          | No                  | Yes                 | She will choose not to talk and instead try to avoid finishing the sentence or statement or say "never mind" | No                                |                                                                               |
| 9.2           | M   | Yes                          | 7                    |                        | Repetitions                                                          | Yes                 | No                  | Frustration, failure to make eye contact                                                                     | No                                |                                                                               |
| 9.3           | M   | Yes                          | 6                    |                        | All of them                                                          | Yes                 | No                  | Child shows signs of tensing up and straining, like he's trying to physically push the words out             | Yes                               | His speech therapist is currently working with him                            |
